# Supplementary material for: Revealing the ACE receptor binding properties and interaction mechanisms of salty oligopeptides from Stropharia rugosoannulata mushroom by molecular simulation and antihypertensive evaluation
Source: Royal Society of Chemistry journal article supplement (doi:10.1039/d4fo00596a), 2024-01-01
Supplement: d4fo00596a1.pdf [file d4fo00596a1.pdf]

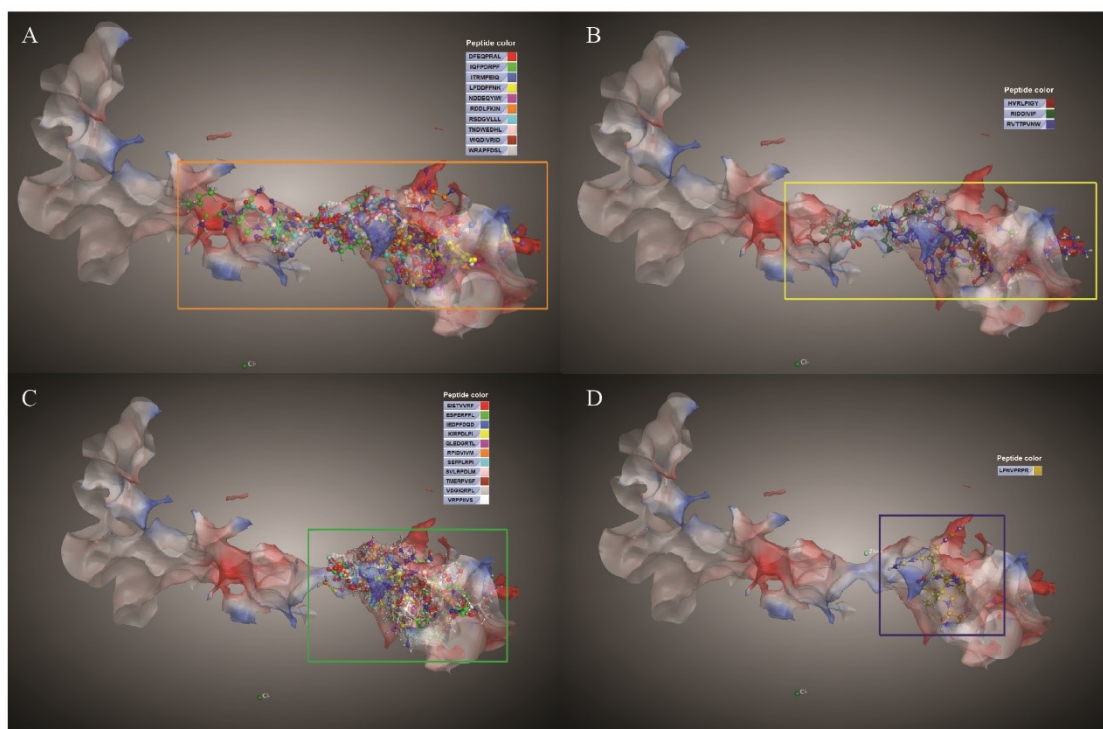

Fig. S1 2D binding plots of 25 octapeptides and the ACE receptor

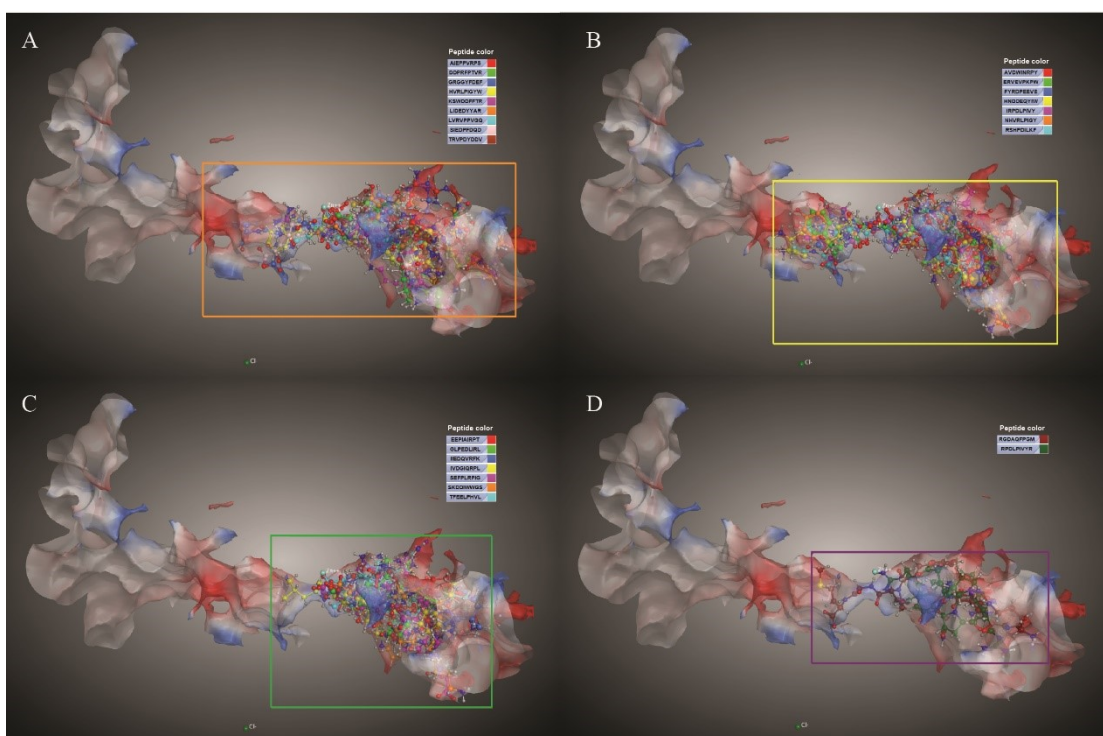

Fig. S2 2D binding plots of 25 nonapeptides and the ACE receptor

Table S1. Fifty oligopeptides information

| Peptide sequence | Peptide molecular weight | Peptide chain length | Peptide secondary mass spectral abundance |
|------------------|--------------------------|----------------------|-------------------------------------------|
| DFEQPRAL         | 974.48                   | 8                    | 1150000                                   |
| EIETVVRF         | 991.53                   | 8                    | 471000                                    |
| ESPERPFL         | 973.49                   | 8                    | 918000                                    |
| HVRLPIGY         | 953.54                   | 8                    | 1510000                                   |
| IEDPFDQD         | 977.40                   | 8                    | 991000                                    |
| IQFPDRPF         | 1018.52                  | 8                    | 1130000                                   |
| ITRMPEIQ         | 986.52                   | 8                    | 1620000                                   |
| KIRPDLPI         | 950.59                   | 8                    | 2510000                                   |
| LFDDFFNK         | 1044.49                  | 8                    | 840000                                    |
| LPNVPRPR         | 947.57                   | 8                    | 95800                                     |
| NDDEQYIW         | 1081.44                  | 8                    | 87200                                     |
| QLEDGRTL         | 930.48                   | 8                    | 58500                                     |
| RDDLFKIN         | 1019.54                  | 8                    | 1370000                                   |
| RIDDIVIF         | 989.55                   | 8                    | 1880000                                   |
| RPIDVIVM         | 941.54                   | 8                    | 2480000                                   |
| RSDGVLLL         | 871.51                   | 8                    | 701000                                    |
| RVTTPVNW         | 971.52                   | 8                    | 1550000                                   |
| SEFPLRPI         | 957.53                   | 8                    | 8010000                                   |
| SVLRPDLM         | 929.50                   | 8                    | 1720000                                   |
| TMERPVSF         | 965.46                   | 8                    | 2270000                                   |
| TNDWEDHL         | 1028.42                  | 8                    | 5450000                                   |
| VDGIQRPL         | 896.51                   | 8                    | 188000                                    |
| VRPPIIVS         | 879.55                   | 8                    | 3930000                                   |
| WQDIVRID         | 1043.54                  | 8                    | 1050000                                   |
| WRAPFDSL         | 990.49                   | 8                    | 1230000                                   |
| AIEPPVRPS        | 964.53                   | 9                    | 1200000                                   |
| AVDWINRPY        | 1132.57                  | 9                    | 2240000                                   |
| DDPRFPTVR        | 1101.56                  | 9                    | 336000                                    |
| EEPIAIRPT        | 1024.56                  | 9                    | 1070000                                   |
| ERVEVPKPW        | 1138.61                  | 9                    | 695000                                    |
| FYRDPEEVE        | 1182.52                  | 9                    | 234000                                    |
| GLPEDLIRL        | 1024.59                  | 9                    | 105000                                    |
| GRGGYFDEF        | 1046.45                  | 9                    | 6620000                                   |
| HNDDEQYIW        | 1218.49                  | 9                    | 3200000                                   |
| HVRLPIGYW        | 1139.62                  | 9                    | 311000                                    |
| IIEDQVRFK        | 1146.64                  | 9                    | 481000                                    |
| IRPDLPIVY        | 1084.63                  | 9                    | 2890000                                   |
| IVDGIQRPL        | 1009.59                  | 9                    | 3590000                                   |
| KSWDDFFTR        | 1200.56                  | 9                    | 2210000                                   |

|           |         |   |          |
|-----------|---------|---|----------|
| LIDEDYYAR | 1156.54 | 9 | 1140000  |
| LVRVPPVGQ | 963.59  | 9 | 5150000  |
| NHVRLPIGY | 1067.59 | 9 | 1420000  |
| RGDAQFPGM | 977.44  | 9 | 3920000  |
| RPDLPIVYR | 1127.65 | 9 | 272000   |
| RSHPDILKF | 1111.61 | 9 | 1540000  |
| SEFPLRPIG | 1014.55 | 9 | 23300000 |
| SIEDPFDQD | 1064.43 | 9 | 82700    |
| SKDDIWWS  | 1092.49 | 9 | 5130000  |
| TFEELPHVL | 1083.56 | 9 | 234000   |
| TRVPDYDDV | 1078.49 | 9 | 3140000  |

Table S2. The binding residues of two oligopeptides to the ACE receptor

|           | Binding amino acid residues in oligopeptide | Binding amino acid residues in the ACE receptor | Interaction mode | Distance between residues (Å) | Binding energy (kcal/mol) | Docking score |
|-----------|---------------------------------------------|-------------------------------------------------|------------------|-------------------------------|---------------------------|---------------|
| ESPERPFL  | E1                                          | ALA356                                          | H-donor          | 2.99                          | -0.9                      | -13.39        |
|           | R5                                          | GLU403                                          | H-donor          | 2.83                          | -2.8                      |               |
|           | R5                                          | GLU403                                          | H-donor          | 3.23                          | -4                        |               |
|           | R5                                          | GLU403                                          | H-donor          | 3.04                          | -1.1                      |               |
|           | F7                                          | GLU123                                          | H-donor          | 3                             | -4.7                      |               |
|           | S2                                          | ARG522                                          | H-acceptor       | 3.22                          | -2.4                      |               |
|           | E4                                          | ARG124                                          | H-acceptor       | 2.98                          | -2.7                      |               |
|           | E4                                          | ARG124                                          | H-acceptor       | 3.23                          | -0.6                      |               |
|           | E1                                          | ZN <sup>2+</sup>                                | Metal            | 1.94                          | -6                        |               |
|           | E1                                          | ZN <sup>2+</sup>                                | Ionic            | 1.94                          | -17.5                     |               |
|           | E4                                          | ARG124                                          | Ionic            | 2.98                          | -4.6                      |               |
|           | E4                                          | ARG124                                          | Ionic            | 3.23                          | -3.1                      |               |
|           | R5                                          | GLU403                                          | Ionic            | 2.83                          | -5.7                      |               |
|           | R5                                          | GLU403                                          | Ionic            | 3.23                          | -3.1                      |               |
|           | R5                                          | GLU403                                          | Ionic            | 3.04                          | -4.2                      |               |
| E1        | HIS387                                      | cation-pi                                       | 4.18             | -1.1                          |                           |               |
| KSWDDFFTR | K1                                          | GLU143                                          | H-donor          | 2.83                          | -11                       | -15.54        |
|           | S2                                          | SER516                                          | H-donor          | 3.49                          | -0.6                      |               |
|           | R9                                          | GLU384                                          | H-donor          | 3.43                          | -1.1                      |               |
|           | R9                                          | GLU384                                          | H-donor          | 3.3                           | -3.3                      |               |
|           | W3                                          | ARG124                                          | H-acceptor       | 2.94                          | -1.3                      |               |

|    |                  |            |      |       |
|----|------------------|------------|------|-------|
| D5 | TRP59            | H-acceptor | 3.12 | -0.5  |
| D5 | TYR62            | H-acceptor | 3.4  | -0.5  |
| R9 | ZN <sup>2+</sup> | Metal      | 1.9  | -4.1  |
| K1 | GLU143           | Ionic      | 2.83 | -5.8  |
| W3 | ARG124           | Ionic      | 3.57 | -1.6  |
| W3 | ARG124           | Ionic      | 3.16 | -3.5  |
| W3 | ARG124           | Ionic      | 3.46 | -2.1  |
| W3 | ARG124           | Ionic      | 3.22 | -3.2  |
| W3 | ARG124           | Ionic      | 2.89 | -5.3  |
| R9 | GLU384           | Ionic      | 3.3  | -2.7  |
| R9 | ZN <sup>2+</sup> | Ionic      | 1.9  | -18.1 |
| R9 | HIS353           | H-pi       | 4.24 | -0.5  |
| F6 | ASN66            | pi-H       | 3.2  | -0.6  |
| W3 | ARG124           | pi-cation  | 4.27 | -1.9  |

---

Table S3. Binding modes of 50 oligopeptides and the ACE receptor

| Binding modes | Oligopeptide | Peptide-binding amino acid residues in the receptor S1, S2, S1' active pockets | Binding energy with Zn <sup>2+</sup> | Binding amino acid residues in peptides | 3D plot     | Bind properties                                                                          |
|---------------|--------------|--------------------------------------------------------------------------------|--------------------------------------|-----------------------------------------|-------------|------------------------------------------------------------------------------------------|
| I             | DFEQPRAL     | ALA354                                                                         | -18.1                                | D1                                      | Figure S1 A |                                                                                          |
| I             | IQFPDRPF     | GLU384, GLN281, HIS353                                                         | -18.3                                | D5, Q2                                  | Figure S1 A |                                                                                          |
| I             | ITRMPEIQ     | HIS353                                                                         | -17.9                                | Q8                                      | Figure S1 A |                                                                                          |
| I             | LFDDFFNK     | GLU384                                                                         | -16.6                                | K8                                      | Figure S1 A | Oligopeptides bound to the amino acid residues of                                        |
| I             | NDDEQYIW     | GLU162, GLU384, HIS353                                                         | -16.9                                | N1, D2, D3                              | Figure S1 A | S1, S2, S1'                                                                              |
| I             | RDDLFKIN     | GLU384, HIS353, TYR523                                                         | -11.4                                | R1, D2                                  | Figure S1 A | Strong binding to Zn <sup>2+</sup> (binding energy < -10 kcal/mol)                       |
| I             | RSDGVLLL     | ALA354                                                                         | -18.9                                | D3                                      | Figure S1 A |                                                                                          |
| I             | TNDWEDHL     | ALA354, GLN281                                                                 | -18.2                                | D3, N2                                  | Figure S1 A |                                                                                          |
| I             | WQDIVRID     | HIS353                                                                         | -14.9                                | D8                                      | Figure S1 A |                                                                                          |
| I             | WRAPFDSL     | HIS353, HIS513                                                                 | -13.3                                | S7, D6, L8                              | Figure S1 A |                                                                                          |
| II            | HVRLPIGY     | HIS353, HIS513                                                                 | -2.3                                 | Y8, G7                                  | Figure S1 B | Oligopeptides bound to the amino acid residues of                                        |
| II            | RIDDIVIF     | HIS353, HIS513                                                                 | -1.1                                 | F8, I7                                  | Figure S1 B | S1, S2, S1'                                                                              |
| II            | RVTTPVNW     | GLU384                                                                         | -3.8                                 | N7                                      | Figure S1 B | Moderately bound to Zn <sup>2+</sup> (binding energy (E), -1 kcal/mol < E < -5 kcal/mol) |
| III           | EIETVVRF     | -                                                                              | -15.6                                | F8                                      | Figure S1 C |                                                                                          |
| III           | ESPERPFL     | -                                                                              | -17.5                                | E1                                      | Figure S1 C |                                                                                          |
| III           | IEDPFDQD     | -                                                                              | -17.1                                | D8                                      | Figure S1 C | Oligopeptides not bound to the amino acid residues of S1, S2, S1'                        |
| III           | KIRPDLPI     | -                                                                              | -15.1                                | D5                                      | Figure S1 C |                                                                                          |
| III           | QLEDGRTL     | -                                                                              | -15.7                                | L8                                      | Figure S1 C | Strongly bound to Zn <sup>2+</sup> (binding energy < -10 kcal/mol)                       |
| III           | RPIDVIVM     | -                                                                              | -14.9                                | M8                                      | Figure S1 C |                                                                                          |
| III           | SEFPLRPI     | -                                                                              | -18.0                                | E2                                      | Figure S1 C |                                                                                          |

|     |           |                                |       |            |             |                                                                                                    |
|-----|-----------|--------------------------------|-------|------------|-------------|----------------------------------------------------------------------------------------------------|
| III | SVLRPDLM  | -                              | -16.6 | D6         | Figure S1 C |                                                                                                    |
| III | TMERPVSF  | -                              | -16.0 | F8         | Figure S1 C |                                                                                                    |
| III | VDGIQRPL  | -                              | -17.0 | L8         | Figure S1 C |                                                                                                    |
| III | VRPPIIVS  | -                              | -16.6 | S8         | Figure S1 C |                                                                                                    |
| V   | LPNVPRPR  | -                              | -     | -          | Figure S1 D | Oligopeptides not bound to the amino acid residues of S1, S2, S1'<br>Not bound to Zn <sup>2+</sup> |
| I   | AIEPPVRPS | ALA354                         | -15.7 | S9         | Figure S2 A |                                                                                                    |
| I   | DDPRFPTVR | ALA354, GLU384                 | -15.6 | R9         | Figure S2 A |                                                                                                    |
| I   | GRGGYFDEF | ALA354, HIS513, LYS511         | -12.2 | F6, D7, E8 | Figure S2 A |                                                                                                    |
| I   | HVRLPIGYW | GLU384, HIS353                 | -15.8 | Y8, W9     | Figure S2 A | Oligopeptides bound to the amino acid residues of S1, S2, S1'                                      |
| I   | KSWDDFFTR | GLU384, HIS353                 | -18.1 | R9         | Figure S2 A | Strong binding to Zn <sup>2+</sup> (binding energy < -10 kcal/mol)                                 |
| I   | LIDEDYYAR | GLU384                         | -18.8 | R9         | Figure S2 A |                                                                                                    |
| I   | LVRVPPVGQ | ALA354, TYR523                 | -18.3 | Q9         | Figure S2 A |                                                                                                    |
| I   | SIEDPFDQD | GLN281, LYS511                 | -16.6 | D7, D9     | Figure S2 A |                                                                                                    |
| I   | TRVPDYDDV | HIS353                         | -16.7 | D8, V9     | Figure S2 A |                                                                                                    |
| II  | AVDWINRPY | ALA354, HIS353                 | -1.6  | A1, V2     | Figure S2 B |                                                                                                    |
| II  | ERVEVPKPW | HIS513, GLN281, LYS511         | -2.9  | K7, P8, W9 | Figure S2 B |                                                                                                    |
| II  | FYRDPEEVE | ALA354, GLN281, HIS353         | -4.7  | E7, V8, E9 | Figure S2 B | Oligopeptides bound to the amino acid residues of S1, S2, S1'                                      |
| II  | HNDDEQYIW | GLU162                         | -2.4  | N2, D4     | Figure S2 B | Moderately bound to Zn <sup>2+</sup> (binding energy (E), -1 kcal/mol < E < -5 kcal/mol)           |
| II  | IRPDLPIVY | GLN281, LYS511                 | -2.0  | I7, Y9     | Figure S2 B |                                                                                                    |
| II  | NHVRLPIGY | ALA354, HIS513, GLN281, LYS511 | -2.8  | I7, G8, Y9 | Figure S2 B |                                                                                                    |
| II  | RSHPDILKF | GLU162, HIS513                 | -3.6  | R1, S2, P4 | Figure S2 B |                                                                                                    |
| III | EEPIAIRPT | -                              | -17.2 | E1         | Figure S2 C | Oligopeptides not bound to the amino acid residues of S1, S2, S1'                                  |
| III | GLPEDLIRL | -                              | -18.1 | L9         | Figure S2 C |                                                                                                    |

|     |           |                        |       |    |             |                                                                    |
|-----|-----------|------------------------|-------|----|-------------|--------------------------------------------------------------------|
| III | IIEDQVRFK | -                      | -18.0 | K9 | Figure S2 C | Strongly bound to Zn <sup>2+</sup> (binding energy < -10 kcal/mol) |
| III | IVDGIQRPL | -                      | -14.3 | L9 | Figure S2 C |                                                                    |
| III | SEFPLRPIG | -                      | -16.6 | G9 | Figure S2 C |                                                                    |
| III | SKDDIWWGS | -                      | -17.6 | S9 | Figure S2 C |                                                                    |
| III | TFEELPHVL | -                      | -14.8 | L9 | Figure S2 C |                                                                    |
| IV  | RGDAQFPGM | GLU384, GLN281, LYS511 | -     | -  | Figure S2 D | Oligopeptides bound to the amino acid residues of                  |
| IV  | RPDLPIVYR | GLU384                 | -     | -  | Figure S2 D | S1, S2, S1'<br>Not bound to Zn <sup>2+</sup>                       |

Note: - meant no binding information.
